# Supplementary material for: Protein-based, but not viral vector alone, HIV vaccine boosting drives an IgG1-biased polyfunctional humoral immune response
Source: JCI journal article supplement (doi:10.1172/jci.insight.135057), 2020-06-17
Supplement: sd1 [file 1]

543  
544  
545  
546  
547  
548  
549

**Supplemental Figure1: Boosting of IgG1 and IgG3 in RV305 groups.**

Line graphs show the levels of IgG1 (top) and IgG3 (bottom) for gp120 MN across the baseline timepoint and post second boost (week 26). Each line represents a vaccinee, Wilcoxon matched-pairs signed rank test was performed, \*\*\*\*  $p < 0.0001$ .
